# Supplementary material
Source: MDPI journal article supplement (https://www.mdpi.com/1099-4300/25/7/964)
Supplement: s1 [file s1]

Archive with 1 entries (1 files):
- entropy-2325013-supplementary.pdf
